# Supplementary material for: Colloidal and Acid Gelling Properties of Mixed Milk and Pea Protein Suspensions
Source: MDPI journal article supplement (doi:10.3390/foods11101383), 2022-05-11
Supplement: s1 [file s1]

# SUPPLEMENTARY MATERIAL – TABLE S1

**Supplementary Material 01** - Milk responses (y) in relation to the protein concentrations (x) for skim milk and mixed milk systems. Table shows the fitted models, adjusted coefficients of determination ( $R_{adj}^2$ ), regression mean squared errors ( $\hat{\sigma}^2$ ), and F-tests for the lack of fit.

| Variables                      | Selected Models                                                                      | Lack of Fit |       |         |
|--------------------------------|--------------------------------------------------------------------------------------|-------------|-------|---------|
|                                |                                                                                      | F           | P     | Signif. |
| pH                             |                                                                                      |             |       |         |
| Milk                           | $y = 6.9357 - 0.0830x + 0.0027x^2$<br>$R^2_{adj} = 0.99, \hat{\sigma}^2 = 0.000270$  | 0.066       | 0.937 | (ns)    |
| Mixed                          | $y = 6.6084 + 0.0427x - 0.0030x^2$<br>$R^2_{adj} = 0.59, \hat{\sigma}^2 = 0.00028$   | 0.046       | 0.956 | (ns)    |
| Viscosity <sup>a</sup> (mPa.s) |                                                                                      |             |       |         |
| Milk                           | $y = 0.9447 - 0.0798x + 0.0010x^2$<br>$R^2_{adj} = 0.99, \hat{\sigma}^2 = 0.00018$   | 1.269       | 0.323 | (ns)    |
| Mixed                          | $y = 1.0388 - 0.1166x + 0.0031x^2$<br>$R^2_{adj} = 0.99, \hat{\sigma}^2 = 0.00021$   | 0.103       | 0.903 | (ns)    |
| Color (L*)                     |                                                                                      |             |       |         |
| Milk                           | $y = 51.0587 + 2.6517x - 0.1450x^2$<br>$R^2_{adj} = 0.86, \hat{\sigma}^2 = 0.67100$  | 3.432       | 0.073 | (ns)    |
| Mixed                          | $y = 64.0835 - 2.6578x + 0.1460x^2$<br>$R^2_{adj} = 0.77, \hat{\sigma}^2 = 1.19400$  | 0.799       | 0.477 | (ns)    |
| Color (a*)                     |                                                                                      |             |       |         |
| Milk                           | $y = -1.4353 - 0.8285x + 0.0518x^2$<br>$R^2_{adj} = 0.57, \hat{\sigma}^2 = 0.15252$  | 0.981       | 0.408 | (ns)    |
| Mixed                          | $y = -6.4810 + 1.1083x - 0.0360x^2$<br>$R^2_{adj} = 0.99, \hat{\sigma}^2 = 0.04300$  | 0.311       | 0.739 | (ns)    |
| Color (b*)                     |                                                                                      |             |       |         |
| Milk                           | $y = -10.3519 + 1.6347x - 0.0568x^2$<br>$R^2_{adj} = 0.93, \hat{\sigma}^2 = 0.48900$ | 2.580       | 0.125 | (ns)    |

|               |                                              |        |       |      |
|---------------|----------------------------------------------|--------|-------|------|
| Mixed         | $y = -15.9802 + 3.8895x - 0.1766x^2$         | 9.656  | 0.005 | **   |
|               | $R_{ajd}^2 = 0.98, \hat{\sigma}^2 = 0.30000$ |        |       |      |
| Sed (% m/m)   |                                              |        |       |      |
| Milk          | $y = 7.0005 - 1.3858x + 0.1503x^2$           | 3.020  | 0.094 | (ns) |
|               | $R_{ajd}^2 = 0.81, \hat{\sigma}^2 = 1.24500$ |        |       |      |
| Mixed         | $y = -10.6600 + 4.7217x$                     | 5.616  | 0.016 | *    |
|               | $R_{ajd}^2 = 0.98, \hat{\sigma}^2 = 3.82000$ |        |       |      |
| Ethanol (v/v) |                                              |        |       |      |
| Milk          | $y = 100.1250 - 3.2083x$                     | 5.792  | 0.015 | *    |
|               | $R_{ajd}^2 = 0.96, \hat{\sigma}^2 = 3.51000$ |        |       |      |
| Mixed         | $y = 89.8333 + 1.9167x - 0.4167x^2$          | 14.500 | 0.001 | **   |
|               | $R_{ajd}^2 = 0.98, \hat{\sigma}^2 = 2.71000$ |        |       |      |

<sup>a</sup>Variable transformed according to the Box-Cox method ( $y = \text{viscosity}^{-0.5}$ ). Signif. Codes: \* P<0.05; \*\* P<0.01; ns = non-significant at 5% level.
