# Supplementary material for: Colloidal and Acid Gelling Properties of Mixed Milk and Pea Protein Suspensions
Source: MDPI journal article supplement (doi:10.3390/foods11101383), 2022-05-11
Supplement: s1 [file s1]

# SUPPLEMENTARY MATERIAL – FIGURE S1

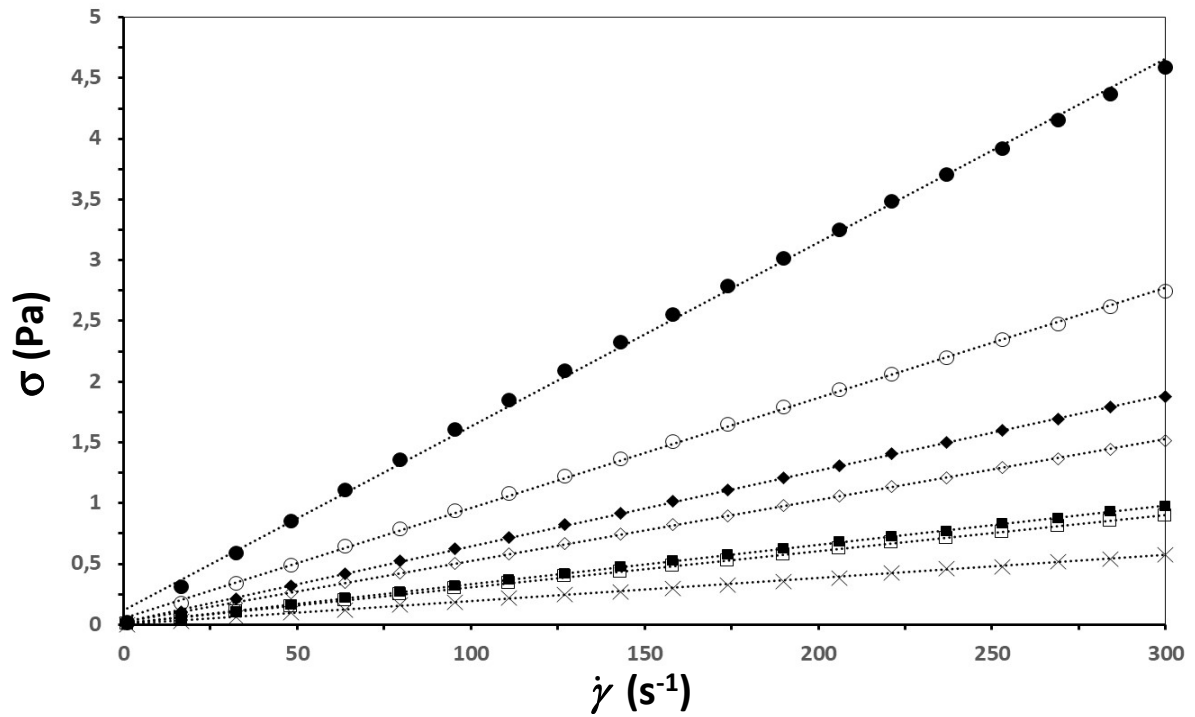

**Supplementary Material 2A** - Flow curves of milk (open symbols) and pea suspensions (closed symbols). The square, diamond, and circle markers represent the 5, 7 and 9% (w/w) protein, respectively. The control milk sample is represented by the “x” symbol. The Dashed Line represents the best fit Newtonian model.

## SUPPLEMENTARY MATERIAL – FIGURE S2

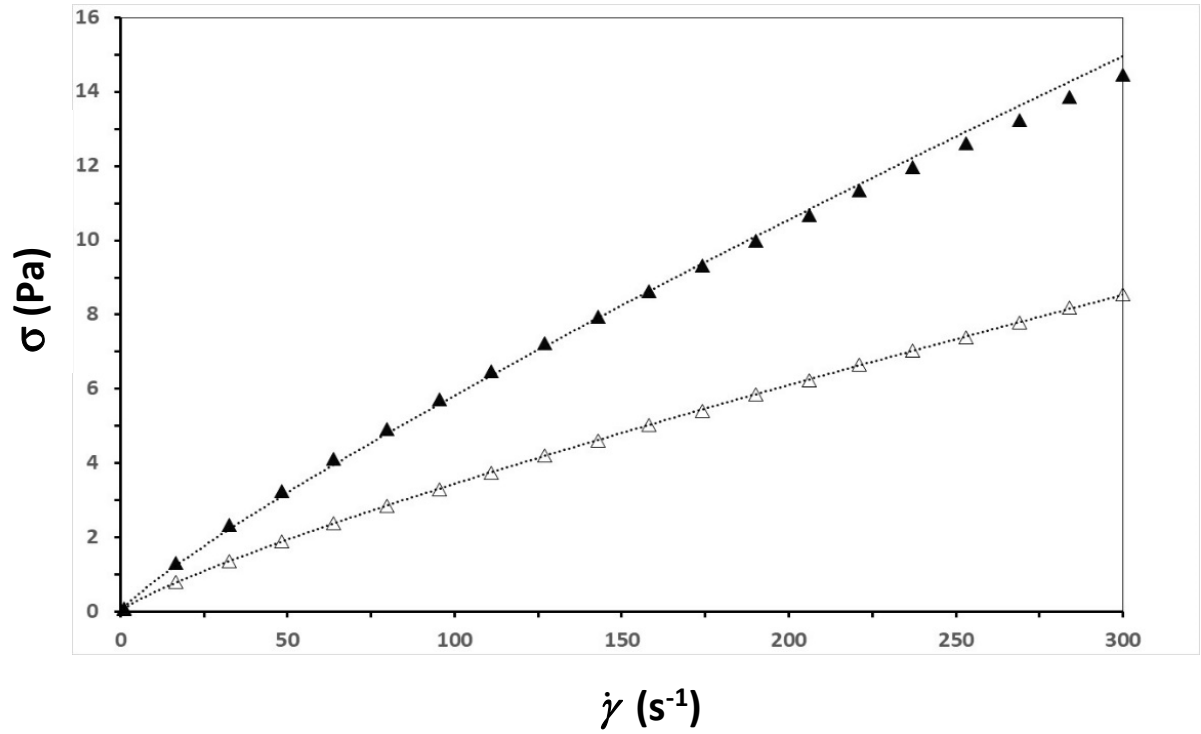

**Supplementary Material 2B.** Flow curves of milk (open symbols) and pea suspensions (closed symbols). The triangle marker represents the 11% (w/w) protein. The dashed line represents the best fit power-law model.
